# Supplementary material for: Kinetics, thermodynamics, equilibrium, surface modelling, and atomic absorption analysis of selective Cu(ii) removal from aqueous solutions and rivers water using silica-2-(pyridin-2-ylmethoxy)ethan-1-ol hybrid material
Source: Royal Society of Chemistry journal article supplement (doi:10.1039/d1ra06640d), 2021-12-22
Supplement: d1ra06640d1.pdf [file d1ra06640d1.pdf]

## Supporting Information

### **Kinetics, thermodynamics, equilibrium, surface modelling and atomic absorption analysis of selective Cu(II) removal from aqueous solutions and rivers water using silica-2-(pyridin-2-ylmethoxy)ethan-1-ol hybrid material**

Said Tighadouini<sup>1\*</sup>, Smaail Radi<sup>2\*</sup>, Othmane Roby<sup>1</sup>, Imad Hammoudan<sup>1</sup>, Rafik Saddik<sup>1</sup>, Yann Garcia<sup>3\*</sup>, Zainab M. Almarhoon<sup>4</sup>, Yahia N. Mabkhot<sup>5\*</sup>

<sup>1</sup> Laboratory of Organic Synthesis, Extraction and Valorization, Faculty of Sciences Ain Chock, Hassan II University, BP: 5366, Casablanca, Morocco. (Emails: [tighadouinis@gmail.com](mailto:tighadouinis@gmail.com) (S.T); [othmaneroby1@gmail.com](mailto:othmaneroby1@gmail.com) (O.R); [hammoudanimad18@gmail.com](mailto:hammoudanimad18@gmail.com) (I.H); [rafik.saddik@gmail.com](mailto:rafik.saddik@gmail.com) (R.S)).

<sup>2</sup> Laboratory of applied Chemistry and Environment (LCAE), Faculty of Sciences, University Mohamed Premier, 60000 Oujda, Morocco. (Email: [s.radi@ump.ac.ma](mailto:s.radi@ump.ac.ma)).

<sup>3</sup> Institute of Condensed Matter and Nanosciences, Molecular Chemistry, Materials and Catalysis (IMCN/MOST), Université catholique de Louvain, Place Louis Pasteur 1, 1348 Louvain-la-Neuve, Belgium (Email: [yann.garcia@uclouvain.be](mailto:yann.garcia@uclouvain.be)).

<sup>4</sup> Department of Chemistry, College of Science, King Saud University, P.O. Box 2455, Riyadh 11451, Saudi Arabia (E-mail: [zalmarhoon@ksu.edu.sa](mailto:zalmarhoon@ksu.edu.sa)).

<sup>4</sup> Department of Pharmaceutical Chemistry, College of Pharmacy, King Khalid University, Abha, P.O. Box 960, Postal code 61421, Saudi Arabia (Email: [ygaber@kku.edu.sa](mailto:ygaber@kku.edu.sa)).

\*Corresponding authors: [tighadouinis@gmail.com](mailto:tighadouinis@gmail.com) (S. Tighadouini), [s.radi@ump.ac.ma](mailto:s.radi@ump.ac.ma) (S. Radi), [ygaber@kku.edu.sa](mailto:ygaber@kku.edu.sa) (Y.N. Mabkhot), [yann.garcia@uclouvain.be](mailto:yann.garcia@uclouvain.be) (Y. Garcia)

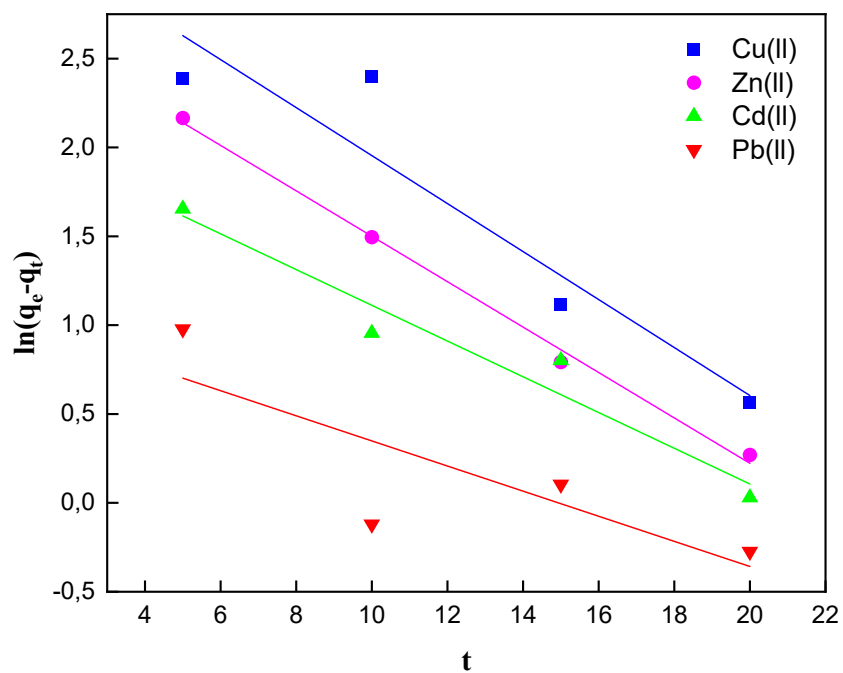

**Fig. S1** Kinetic curves of Cu(II), Zn(II), Cd(II) and Pb(II) adsorption rate onto SiPy fitted by pseudo-first-order. Adsorption conditions:  $V = 10$  mL,  $m = 10$  mg of adsorbent, pH = 6, and optimum concentrations:  $180.66$ ,  $140.10$ ,  $99.70$  and  $95,63 \cdot 10^{-3}$  mg L<sup>-1</sup> for Cu(II), Zn(II), Cd(II) and Pb(II) respectively at 25 °C.

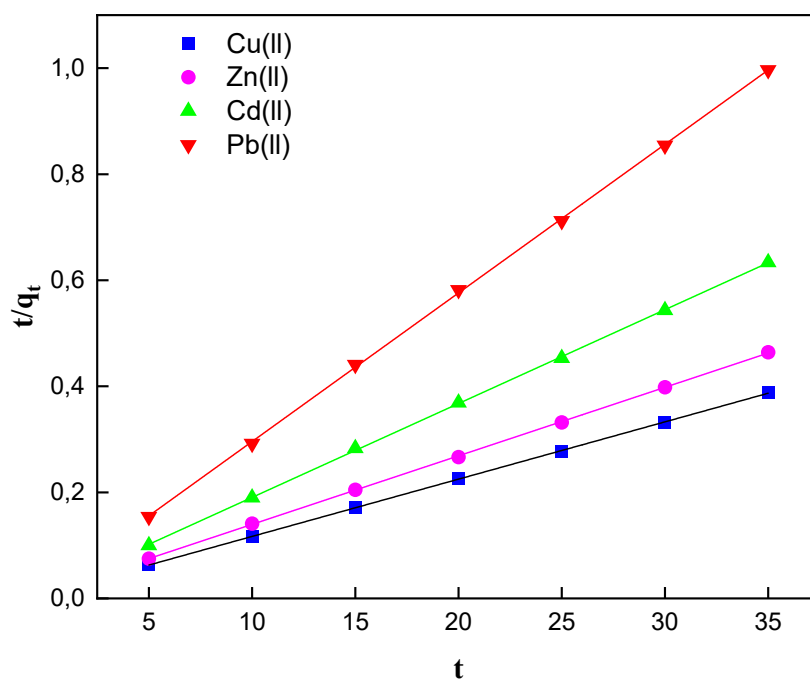

**Fig. S2** Kinetic curves of Cu(II), Zn(II), Cd(II) and Pb(II) adsorption rate onto SiPy fitted by pseudo-second-order. Adsorption conditions:  $V = 10$  mL,  $m = 10$  mg of adsorbent, pH = 6, and optimum concentrations: 180.66, 140.10, 99.70 and 95,63.10<sup>-3</sup> mg L<sup>-1</sup> for Cu(II), Zn(II), Cd(II) and Pb(II) respectively at 25 °C.

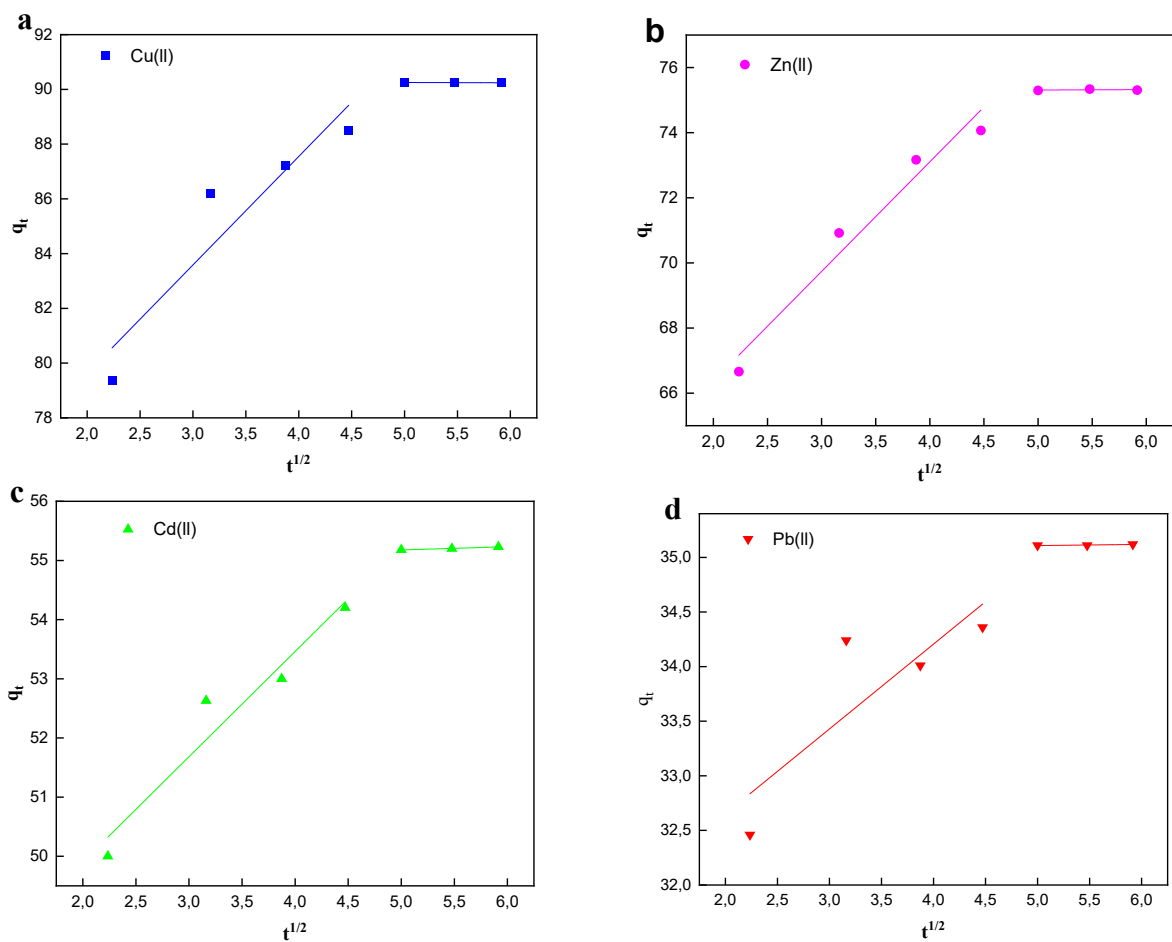

**Fig S3a, b, c, d** Intra-particle diffusion model (a) copper, (b) zinc, (c) cadmium and (d) lead. Adsorption conditions:  $V = 10$  mL,  $m = 10$  mg of adsorbent, pH = 6, and optimum concentrations:  $180.66$ ,  $140.10$ ,  $99.70$  and  $95,63 \cdot 10^{-3}$  mg L<sup>-1</sup> for Cu(II), Zn(II), Cd(II) and Pb(II) respectively at 25 °C.

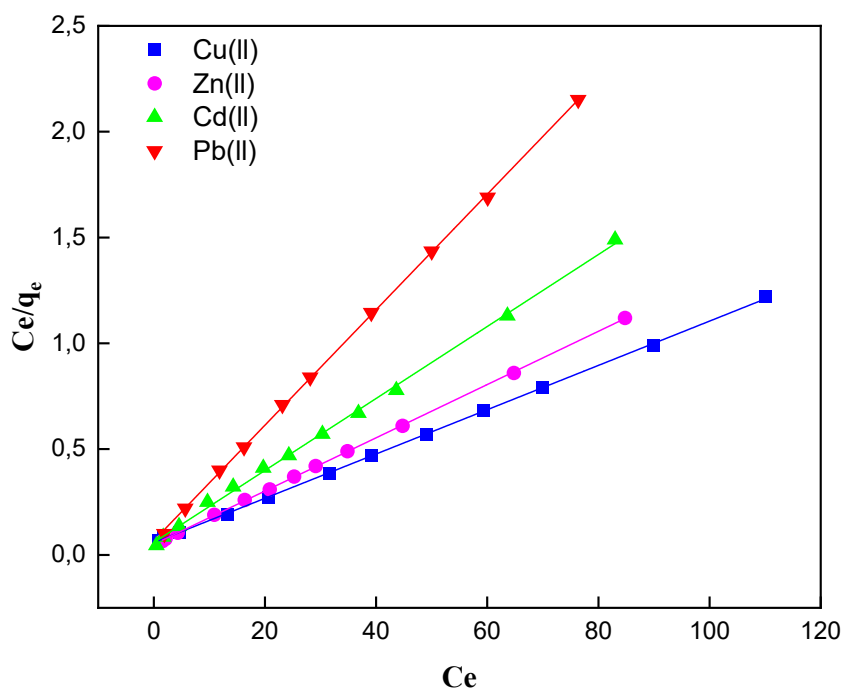

**Fig S4** Adsorption isotherms of SiPy towards Cu(II), Zn(II), Cd(II) and Pb(II) fitted by Langmuir. Adsorption conditions:  $m = 10$  mg,  $V = 10$  mL,  $[Mn(II)] = 10$  to  $300 \cdot 10^{-3}$  g L $^{-1}$ , pH = 6, time = 25 min at 25 °C.

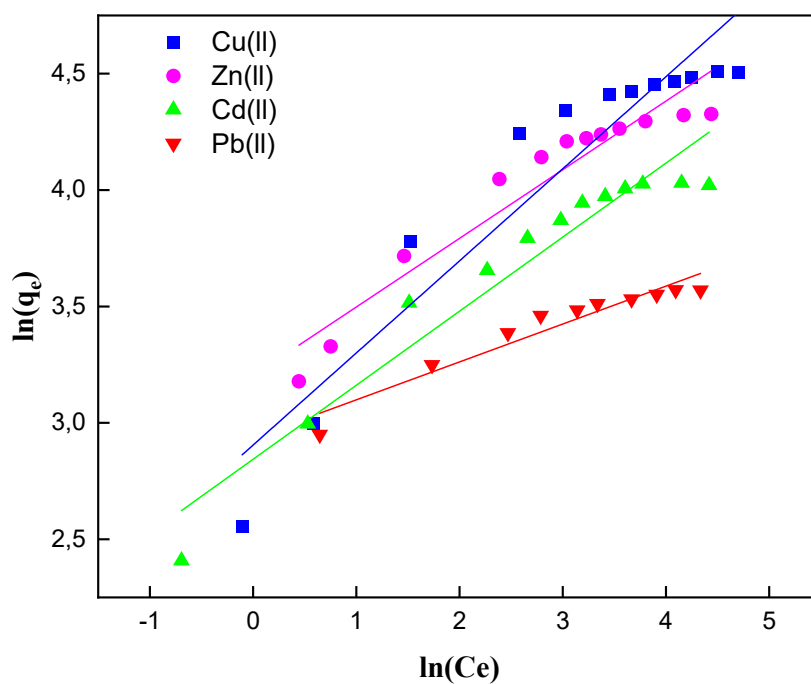

**Fig S5** Adsorption isotherms of **SiPy** towards Cu(II), Zn(II), Cd(II) and Pb(II) fitted by Freundlich. Adsorption conditions:  $m = 10$  mg,  $V = 10$  mL,  $[\text{Mn(II)}] = 10$  to  $300 \cdot 10^{-3}$  g L $^{-1}$ , pH = 6, time = 25 min at 25 °C.

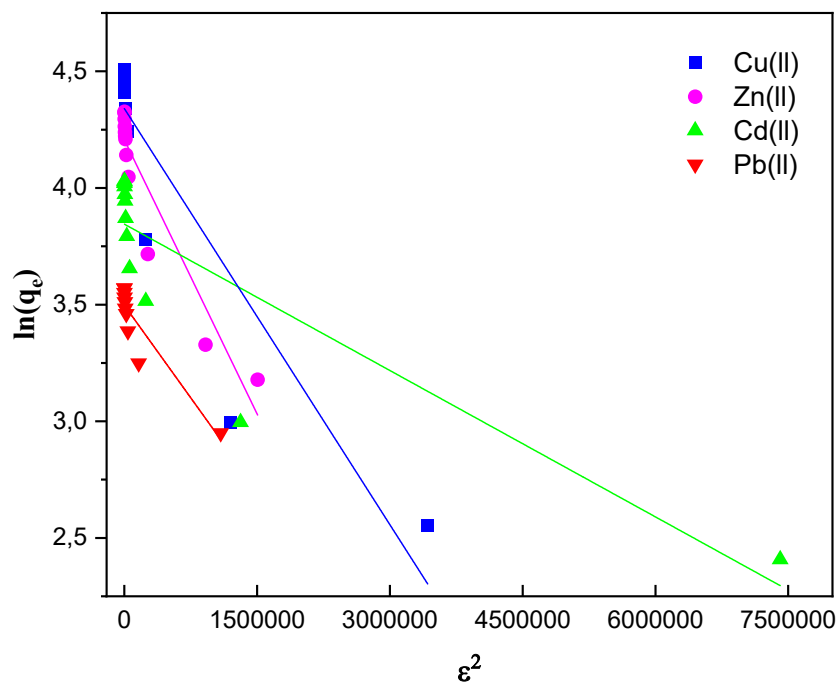

**Fig S6** Adsorption isotherms of **SiPy** towards Cu(II), Zn(II), Cd(II) and Pb(II) fitted by Dubinin-Radushkevich (D-R). Adsorption conditions:  $m = 10$  mg,  $V = 10$  mL,  $[\text{Mn(II)}] = 10$  to  $300 \cdot 10^{-3}$  g L $^{-1}$ , pH = 6, time = 25 min at 25 °C.

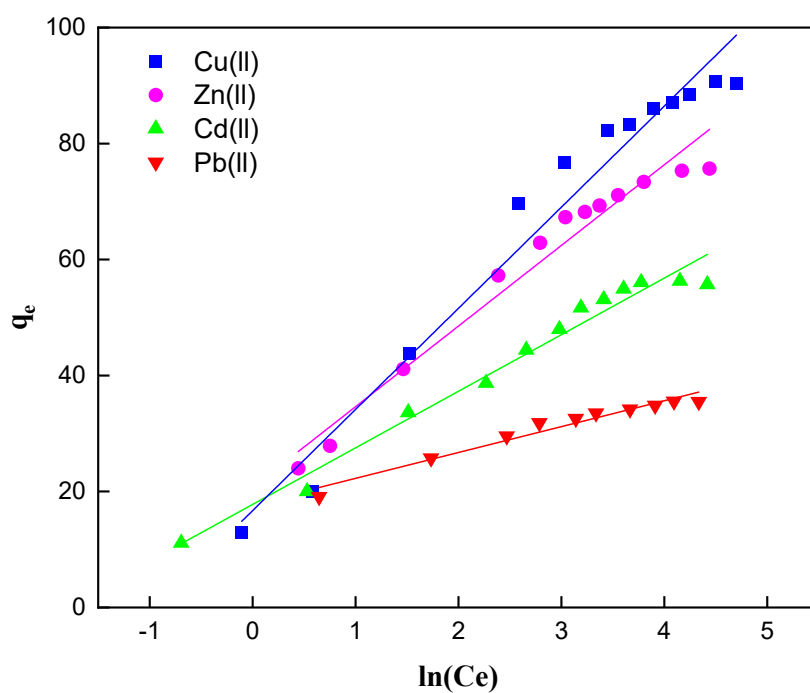

**Fig S7** Adsorption isotherms of SiPy towards Cu(II), Zn(II), Cd(II) and Pb(II) fitted by Temkin. Adsorption conditions:  $m = 10$  mg,  $V = 10$  mL,  $[Mn(II)] = 10$  to  $300 \cdot 10^{-3}$  g L $^{-1}$ , pH = 6, time = 25 min at 25 °C.
